# Supplementary material for: Genetics Visit Uptake Among Individuals Receiving Clinically Actionable Genomic Screening Results
Source: PubMed Central journal article supplement (PMC10943406; doi:10.1001/jamanetworkopen.2024.2388), 2024-03-15
Supplement: jamanetwopen-e242388-s002.pdf [file jamanetwopen-e242388-s002.pdf]

## Data Sharing Statement

Schwartz. Genetics Visit Uptake Among Individuals Receiving Clinically Actionable Genomic Screening Results. *JAMA Netw Open*. Published March 14, 2024.

doi:10.1001/jamanetworkopen.2024.2388

### Data

**Data available:** Yes

**Data types:** Deidentified participant data

**How to access data:** Adam Buchanan, [ahbuchanan@geisinger.edu](mailto:ahbuchanan@geisinger.edu)

**When available:** With publication

### Supporting Documents

**Document types:** Informed consent form

**How to access documents:** Adam Buchanan, [ahbuchanan@geisinger.edu](mailto:ahbuchanan@geisinger.edu)

**When available:** With publication

### Additional Information

**Who can access the data:** researchers whose proposed use of data has been approved

**Types of analyses:** for specified purpose

**Mechanisms of data availability:** signed data access agreement
